# Supplementary material for: The Effects of Balloon-Guide Catheters on Outcomes after Mechanical Thrombectomy in Acute Ischemic Strokes : A Meta-Analysis
Source: PubMed Central journal article supplement — J Korean Neurosurg Soc. 2019 May 8;62(4):389–97. doi: 10.3340/jkns.2018.0165 (PMC6616979; doi:10.3340/jkns.2018.0165), 2019-05-08
Supplement: jkns-2018-0165-suppl1.pdf [file jkns-2018-0165-suppl1.pdf]

## Supplementary material

### Search strategy

The following search strategy, using a combination of MeSH terms and free text terms, was used for MEDLINE (via PubMed) and modified for the other electronic database searches. The search was restricted to English language articles.

#### MEDLINE Search Strategy (via PubMed)

1. brain ischemia[MeSH Terms] or stroke[MeSH Terms] or intracranial embolism and thrombosis [MeSH Terms]
2. (ischemi\* and stroke\*).tw.
3. #1 or #2
4. reperfusion or interventional or thrombectomy or embolectomy or endovascular procedure or cerebral revascularization
5. (mechanical thrombol\* or endovascular).tw.
6. (aspiration or thromboaspiration or embolectomy or thrombectomy or stent or recanalization).tw.
7. #4 or #5 or #6
8. thrombolytic therapy or fibrinolysis or fibrinolytic agents or plasminogen activators
9. (thromboly\* or fibrinoly\* or recanaliz\* or recanaliz\*).tw.
10. (tPA or t-PA or rtPA or rt-PA or plasminogen or plasmin or alteplase or actilyse).tw.
11. #8 or #9 or #10
12. balloon guiding catheter or balloon catheter
13. (fatal\* or death or mortalit\* or complication).tw.
14. Complications
15. Controlled clinical trials as topic[MH]
16. randomized controlled trial.pt.
17. controlled clinical trial.pt.
18. random\*.tw.
19. controlled and (trial\* or stud\*).tw.

#### EMBASE Search Strategy (via OVID)

1. exp brain ischemia/ or exp brain infarction/ or exp stroke/ or exp brain embolism/
2. (isch?emi\$ adj6 (stroke\$ or apoplexy\$ or cerebral vasc\$ or cerebrovasc\$ or cva)).ti,ab.tw.
3. or/1-2
4. exp(cerebral revascularization or reperfusion or thrombectomy or embolectomy)/
5. exp(endovascular procedure or interventional or stent or catheters)/
6. (mechanical thrombol\$ or thromboaspiration or embolectomy or thrombectomy or recanalization).tw.
7. (angioplasty\$ or stent\$).tw.
8. ((clot or thromb\$ or thrombi or embol\$) adj5 (aspirat\$ or retriev\$ or extract\$)).tw.
9. ((retrieval or extraction) adj5 device\$).tw.
10. or/5-10
11. exp(thrombolytic therapy or fibrinolysis or fibrinolytic agents or plasminogen activators)/
12. (thromboly\$ or fibrinoly\$ or recanaliz\$ or recanaliz\$).tw.
13. ((clot\$ or thrombus) adj4 (lyse or lysis)).tw.
14. (tPA or t-PA or rtPA or rt-PA or plasminogen or plasmin or alteplase).tw.
15. or/11-14
16. exp balloon guiding catheter
17. exp Randomized Controlled Trials/as topic
18. exp random allocation/
19. exp Controlled clinical trials/
20. or/17-20

#### Cochrane Central Register of Controlled Trials (via OVID)

1. exp brain ischemia/ or exp stroke/
2. (isch?emi\$ adj6 (stroke\$ or cerebral vasc\$)).ti,ab,kw.
3. ((brain or cerebr\$) adj5 (isch?emi\$ or infarct\$ or thrombo\$ or emboli\$)).ti,ab,kw.
4. Or/1-3
5. exp (cerebral revascularization or reperfusion or thrombectomy or embolectomy)/
6. exp(endovascular procedure or interventional or stents or catheters)/
7. (mechanical thrombol\$ or thromboaspiration or embolectomy or thrombectomy or recanalization).ti,ab,kw.
8. (angioplasty\$ or stent\$).ti,ab,kw.
9. or/5-8
10. exp(thrombolytic therapy or fibrinolysis or fibrinolytic agents or plasminogen activators)/
11. (thromboly\$ or fibrinoly\$ or recanaliz\$ or recanaliz\$).ti,ab,kw.
12. ((clot\$ or thrombus) near (lyse or lysis)).ti,ab,kw.
13. (tPA or t-PA or rtPA or rt-PA or plasminogen or plasmin or alteplase).ti,ab,kw.
14. or/10-13
15. exp(balloon guiding catheter)
16. (fatal\$ or death or mortalit\$). ti,ab,kw.
17. or/15-16
