# Supplementary material for: The Effects of Balloon-Guide Catheters on Outcomes after Mechanical Thrombectomy in Acute Ischemic Strokes : A Meta-Analysis
Source: PubMed Central journal article supplement — J Korean Neurosurg Soc. 2019 May 8;62(4):389–97. doi: 10.3340/jkns.2018.0165 (PMC6616979; doi:10.3340/jkns.2018.0165), 2019-05-08
Supplement: jkns-2018-0165-suppl2.pdf [file jkns-2018-0165-suppl2.pdf]

**Supplementary Table 1.** Quality assessment of studies included in the meta-analysis using the Newcastle-Ottawa Scale

| Study                               | Selection                                |                                     |                           | Comparability | Outcome                                           |                       |                             | Total score |
|-------------------------------------|------------------------------------------|-------------------------------------|---------------------------|---------------|---------------------------------------------------|-----------------------|-----------------------------|-------------|
|                                     | Representativeness of the exposed cohort | Selection of the non-exposed cohort | Ascertainment of exposure |               | Outcome of interest not present at start of study | Assessment of outcome | Adequacy of duration of f/u |             |
| Nguyen et al. <sup>16</sup> (2014)  | ★                                        | ★                                   | ★                         | ★             | ★                                                 | ★                     | ★                           | 7           |
| Velasco et al. <sup>20</sup> (2016) | ★                                        | ★                                   | ★                         | ★             | ★                                                 |                       |                             | 5           |
| Lee et al. <sup>12</sup> (2017)     | ★                                        | ★                                   | ★                         | ★             | ★                                                 |                       |                             | 5           |
| Oh et al. <sup>17</sup> (2017)      | ★                                        | ★                                   | ★                         | ★             | ★                                                 | ★                     | ★                           | 7           |

f/u : follow-up
