# Supplementary material for: The Effects of Balloon-Guide Catheters on Outcomes after Mechanical Thrombectomy in Acute Ischemic Strokes : A Meta-Analysis
Source: PubMed Central journal article supplement — J Korean Neurosurg Soc. 2019 May 8;62(4):389–97. doi: 10.3340/jkns.2018.0165 (PMC6616979; doi:10.3340/jkns.2018.0165), 2019-05-08
Supplement: jkns-2018-0165-suppl3.pdf [file jkns-2018-0165-suppl3.pdf]

**Supplementary Table 2.** Publication bias analysis using the “trim-and-fill” methods for identification of successful recanalization and distal emboli in this meta-analysis

| Outcomes                  | Studies trimmed | Point Estimate | Lower limit | Upper limit | Q-value |
|---------------------------|-----------------|----------------|-------------|-------------|---------|
| Successful recanalization |                 |                |             |             |         |
| Observed values           |                 | 1.632          | 1.293       | 2.059       | 9.967   |
| Adjusted values           | 2               | 1.489          | 1.191       | 1.860       | 17.824  |
| Distal emboli             |                 |                |             |             |         |
| Observed values           |                 | 0.404          | 0.108       | 1.505       | 12.716  |
| Adjusted values           | 2               | 1.165          | 0.310       | 4.382       | 39.354  |
